# Supplementary material
Source: publisher figshare collection journal article supplement (https://karger.figshare.com/ndownloader/files/18172235)
Supplement: Supplementary file 1 [file 18172235]

Patients diagnosed with CHD (N=802)

(From August 2016 to October 2017)

Incomplete information(n=153)

N=649

Heavy drinking（n=65）

Chronic hepatopathy（n=33）

N=551

Thyroid disorder（n=26） taking metformin, thiazolidione and diet pills within half a year（n=71）

N=454

Non-NAFLD non-obese

NAFLD

obese

NAFLD

non-obese

Non-NAFLD obese

**Figure S1** Patient screening process.
